# Supplementary material
Source: HighWire-hosted journal article supplement (https://qualitysafety.bmj.com/content/bmjqs-2019-009897)
Supplement: inline-supplementary-material-1 [file inline-supplementary-material-1.pdf]

## Supplementary files

**Table S1.** Counts of PPI dispensings, discontinuations and switches to any lower strength PPI stratified by medicine and strength, in the year before (April 2014 – April 2015) and the year after (May 2016 – May 2017) the NPS MedicineWise program and Choosing Wisely recommendations.

| PPI dispensings, n (%)       | Year before initiatives<br>April 2014 – April 2015 |           | Year after initiatives<br>May 2016 – May 2017 |           |
|------------------------------|----------------------------------------------------|-----------|-----------------------------------------------|-----------|
|                              | Any PPI                                            | 1,972,328 | (100)                                         | 2,050,768 |
| <b>omeprazole</b>            | 244,730                                            | (12.4)    | 216,101                                       | (10.5)    |
| standard strength            | 241,000                                            | (12.2)    | 211,667                                       | (10.3)    |
| low strength                 | 3730                                               | (0.2)     | 4434                                          | (0.2)     |
| <b>pantoprazole</b>          | 569,309                                            | (28.9)    | 636,847                                       | (31.1)    |
| standard strength            | 495,503                                            | (25.1)    | 542,022                                       | (26.4)    |
| low strength                 | 73,806                                             | (3.7)     | 94,825                                        | (4.6)     |
| <b>lansoprazole</b>          | 52,831                                             | (2.7)     | 48,199                                        | (2.4)     |
| standard strength            | 50,603                                             | (2.6)     | 45,769                                        | (2.2)     |
| low strength                 | 2228                                               | (0.1)     | 2430                                          | (0.1)     |
| <b>rabeprazole</b>           | 272,347                                            | (13.8)    | 263,896                                       | (12.9)    |
| standard strength            | 262,340                                            | (13.3)    | 252,381                                       | (12.3)    |
| low strength                 | 10,007                                             | (0.5)     | 11,515                                        | (0.6)     |
| <b>esomeprazole</b>          | 833,111                                            | (42.2)    | 885,725                                       | (43.2)    |
| high strength                | 344,739                                            | (17.5)    | 357,393                                       | (17.4)    |
| standard strength            | 488,372                                            | (24.8)    | 528,332                                       | (25.8)    |
| PPI discontinuation, n (%) * | Year before initiatives<br>April 2014 – April 2015 |           | Year after initiatives<br>May 2016 – May 2017 |           |
| Any PPI                      | 180,012                                            | (100)     | 194,447                                       | (100)     |
| <b>omeprazole</b>            | 16,463                                             | (9.2)     | 15,949                                        | (8.2)     |
| standard strength            | 16,085                                             | (8.9)     | 15,457                                        | (8.0)     |
| low strength                 | 378                                                | (0.2)     | 492                                           | (0.3)     |
| <b>pantoprazole</b>          | 51,622                                             | (28.7)    | 60,646                                        | (31.2)    |
| standard strength            | 44,431                                             | (24.7)    | 51,473                                        | (26.5)    |
| low strength                 | 7191                                               | (4.0)     | 9173                                          | (4.7)     |

|                                                                        |                                                            |        |                                                       |        |
|------------------------------------------------------------------------|------------------------------------------------------------|--------|-------------------------------------------------------|--------|
| <b>lansoprazole</b>                                                    | 3349                                                       | (1.9)  | 3209                                                  | (1.7)  |
| standard strength                                                      | 3166                                                       | (1.8)  | 3002                                                  | (1.5)  |
| low strength                                                           | 183                                                        | (0.1)  | 207                                                   | (0.1)  |
| <b>rabeprazole</b>                                                     | 22,471                                                     | (12.5) | 21,084                                                | (10.8) |
| standard strength                                                      | 21,540                                                     | (12.0) | 20,054                                                | (10.3) |
| low strength                                                           | 931                                                        | (0.5)  | 1030                                                  | (0.5)  |
| <b>esomeprazole</b>                                                    | 86,107                                                     | (47.8) | 93,559                                                | (48.1) |
| high strength                                                          | 50,654                                                     | (28.1) | 53,144                                                | (27.3) |
| standard strength                                                      | 35,453                                                     | (19.7) | 40,415                                                | (20.8) |
| <b>rabeprazole</b>                                                     | 22,471                                                     | (12.5) | 21,084                                                | (10.8) |
| standard strength                                                      | 21,540                                                     | (12.0) | 20,054                                                | (10.3) |
| low strength                                                           | 931                                                        | (0.5)  | 1030                                                  | (0.5)  |
| <b>esomeprazole</b>                                                    | 86,107                                                     | (47.8) | 93,559                                                | (48.1) |
| high strength                                                          | 50,654                                                     | (28.1) | 53,144                                                | (27.3) |
| standard strength                                                      | 35,453                                                     | (19.7) | 40,415                                                | (20.8) |
| <b>Switches to any lower strength PPI, n (%)<sup>†</sup></b>           | <b>Year before initiatives<br/>April 2014 – April 2015</b> |        | <b>Year after initiatives<br/>May 2016 – May 2017</b> |        |
| from any PPI                                                           | 35,538                                                     | (100)  | 40,201                                                | (100)  |
| from <b>omeprazole</b><br>standard to any low strength                 | 572                                                        | (1.6)  | 642                                                   | (1.6)  |
| from <b>pantoprazole</b><br>standard to any low strength               | 4200                                                       | (11.8) | 5860                                                  | (14.6) |
| from <b>lansoprazole</b><br>standard to any low strength               | 154                                                        | (0.4)  | 228                                                   | (0.6)  |
| from <b>rabeprazole</b><br>standard to any low strength                | 911                                                        | (2.6)  | 1195                                                  | (3.0)  |
| from <b>esomeprazole</b> <sup>‡</sup><br>high to any standard strength | 28,272                                                     | (79.6) | 30,341                                                | (75.5) |
| from <b>esomeprazole</b><br>high to any low strength                   | 655                                                        | (1.8)  | 899                                                   | (2.2)  |
| from <b>esomeprazole</b><br>standard to any low strength               | 774                                                        | (2.2)  | 1036                                                  | (2.6)  |

\*Stratified by first medicine dispensed within the course of treatment.

<sup>†</sup> Stratified by higher strength medicine person switched from

<sup>‡</sup> Esomeprazole was further stratified as it was the only medicine to have both a high and standard strength formulations on market. No low strength esomeprazole was publicly subsidised in Australia

**Table S2.** Change in the monthly dispensing counts and rates of discontinuation among **concessional beneficiaries** at each intervention point, estimated using autoregressive integrated moving average (ARIMA) models adjusted for seasonality.

|                                  | Seasonal ARIMA model specification* | Mean monthly dispensings <sup>†</sup> | Level shift <sup>‡</sup> from April 2015<br>% (95% CI) | Level shift <sup>‡</sup> from May 2016<br>% (95% CI) |
|----------------------------------|-------------------------------------|---------------------------------------|--------------------------------------------------------|------------------------------------------------------|
| <b>Dispensing counts</b>         |                                     |                                       |                                                        |                                                      |
| PPIs                             | (2,1,0) (0,1,0) <sub>12</sub>       | 101,790                               | 0.8 (-0.5 to 2.0)                                      | -1.8 (-2.9 to -0.7)                                  |
| high strength                    | (0,1,1) (0,1,0) <sub>12</sub>       | 18,585                                | 1.0 (-1.6 to 3.6)                                      | -0.6 (-2.8 to 2.2)                                   |
| standard strength                | (2,1,0) (0,1,0) <sub>12</sub>       | 78,705                                | 0.8 (-0.5 to 2.1)                                      | -2.2 (-3.2 to -1.1)                                  |
| low strength                     | (0,1,1) (0,1,0) <sub>12</sub>       | 4,500                                 | 1.2 (-1.3 to 3.8)                                      | -0.2 (-2.7 to 2.4)                                   |
| statins (control)                | (2,1,0) (0,1,0) <sub>12</sub>       | 117,869                               | 0.6 (-1.1 to 2.3)                                      | -2.2 (-3.6 to -0.7)                                  |
| <b>Treatment discontinuation</b> |                                     |                                       |                                                        |                                                      |
|                                  |                                     |                                       | <b>(95% CI)</b>                                        | <b>(95% CI)</b>                                      |
| PPIs                             | (0,0,1) (0,1,1) <sub>12</sub>       |                                       | -0.1 (-0.1 to 0.3)                                     | -0.01 (-0.2 to 0.2)                                  |
| statins (control)                | (0,0,1) (0,1,0) <sub>12</sub>       |                                       | -0.03 (-0.2 to 0.2)                                    | 0.1 (-0.1 to 0.3)                                    |

ARIMA, autoregressive integrated moving average; PPI, proton pump inhibitor; CI, confidence interval

\*ARIMA (p,d,q) x (P,D,Q)<sub>12</sub> model where 12 indicates seasonal differencing at 12-month lag

<sup>†</sup>Mean monthly dispensings in the year leading up to NPS program in April 2015

<sup>‡</sup>A sudden, sustained change for the remainder of the study period

## Supplementary figures:

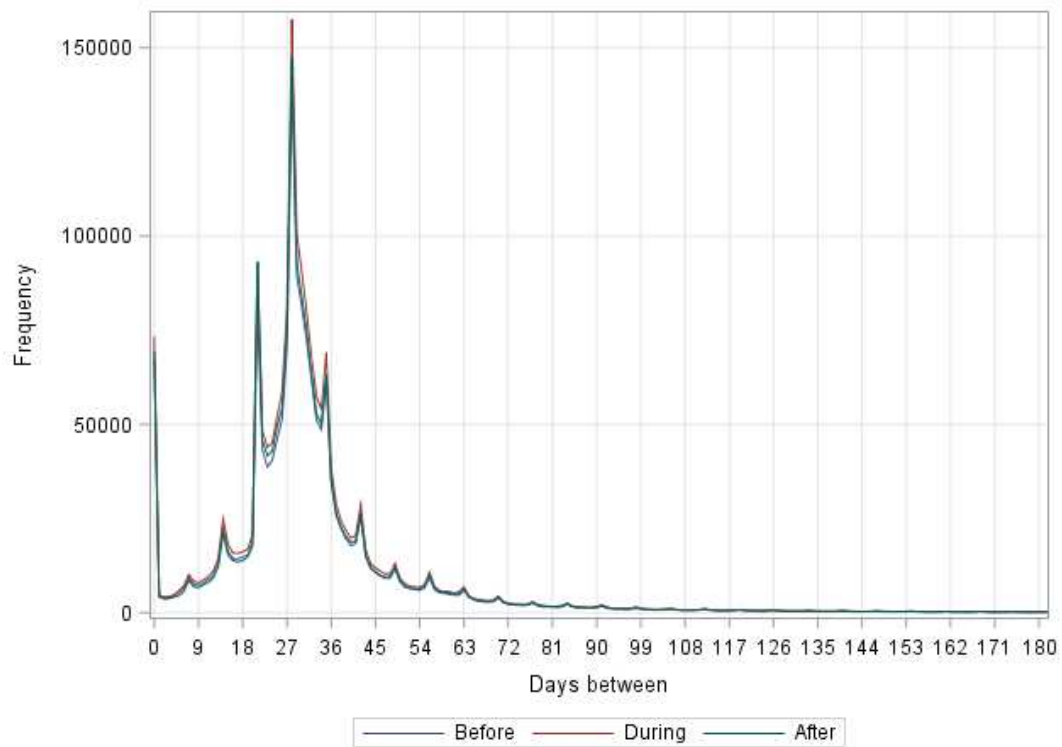

**Figure S1.** Time between dispensings (days) in the year before (April 2014 – April 2015), during (April 2015 – April 2016) and year after (May 2016 – May 2017) the NPS MedicineWise PPI program and Choosing Wisely recommendations.

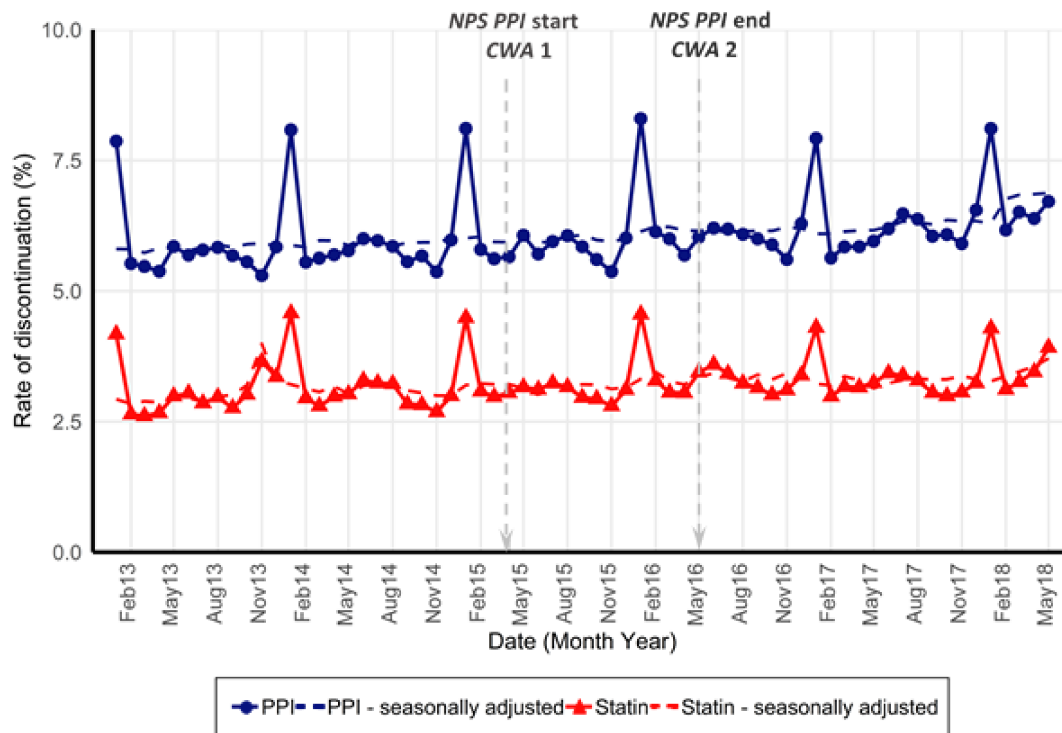

**Figure S2.** Monthly unadjusted and seasonally adjusted (dashed line) rate (%) of proton pump inhibitors (PPI) and statin discontinuation among those covered by treatment for *concessional beneficiaries*, from January 2013 to May 2018. NPS MedicineWise’s PPI program (NPS PPI) start and end and Choosing Wisely (CWA) recommendations 1 and 2 marked at April 2015 and May 2016.
